# Supplementary material for: Lack of association between IGF2BP2 rs4402960 polymorphism and gestational diabetes mellitus: a case–control study, meta-analysis and trial sequential analysis
Source: Oxford University Press journal article supplement (doi:10.1042/bsr20200990), 2020-07-01
Supplement: bsr-2020-0990_supp.pdf [file bsr-2020-0990_supp.pdf]

**Table S1 Summary NOS of the studies included in the meta-analysis**

| Study            | Selection (4 stars)             |                                 |                       |                        | Comparability<br>(2 stars) | Exposure (3 stars)        |                                                     |                   | Overall |
|------------------|---------------------------------|---------------------------------|-----------------------|------------------------|----------------------------|---------------------------|-----------------------------------------------------|-------------------|---------|
|                  | Is the case definition adequate | Representativeness of the cases | Selection of Controls | Definition of Controls |                            | Ascertainment of exposure | Same method of ascertainment for cases and controls | Non-Response rate |         |
| Lauenborg (2009) | ★                               | ★                               | ★                     | ★                      |                            | ★                         | ★                                                   |                   | 6       |
| Cho (2009)       | ★                               | ★                               | ★                     | ★                      |                            | ★                         | ★                                                   |                   | 6       |
| Wang (2011)      | ★                               | ★                               | ★                     | ★                      | ★                          | ★                         | ★                                                   | ★                 | 8       |
| Chon (2013)      | ★                               | ★                               | ★                     | ★                      | ★                          |                           | ★                                                   |                   | 6       |
| Popova (2017)    | ★                               | ★                               | ★                     | ★                      |                            | ★                         | ★                                                   | ★                 | 7       |
| Tarnowski (2019) | ★                               | ★                               | ★                     | ★                      |                            | ★                         | ★                                                   | ★                 | 7       |
| Current study    | ★                               | ★                               | ★                     | ★                      |                            | ★                         | ★                                                   |                   | 6       |
